# Supplementary material for: An expedient synthesis of 5-n-alkylresorcinols and novel 5-n-alkylresorcinol haptens
Source: Beilstein J Org Chem. 2009 May 19;5:22. doi: 10.3762/bjoc.5.22 (PMC2707013; doi:10.3762/bjoc.5.22)
Supplement: File 1 — Experimental and data [file Beilstein_J_Org_Chem-05-22-s001.doc]

**Experimental and data**

**for:**

An expedient synthesis of 5-*n*-alkylresorcinols and novel 5-*n*-alkylresorcinol haptens

Kirsti Parikka1,2 and Kristiina Wähälä*,1

Address: 1 Laboratory of Organic Chemistry, Department of Chemistry, P.O. Box 55, FIN-00014-University of Helsinki, Finland, tel. +358 9 191 50356, fax +358 9 191 50357 and 2(present address:) Department of Applied Chemistry and Microbiology, P.O. Box 27, FIN-00014-University of Helsinki, Finland

Email: Kristiina Wähälä* - [Kristiina.Wahala@helsinki.fi](mailto:Kristiina.Wahala@helsinki.fi)

*Corresponding author.

General

The reagents were purchased from Aldrich except ethyl 7-bromoheptanoate, which was purchased from Pfaltz & Bauer. Methyl 11-iodoundecanoate (Scheme 1, step c) was prepared according to literature [1]. The microwave assisted Wittig reactions were performed using a CEM Discover system. NMR spectra of the synthesized compounds were obtained with a Varian 200 or 300 MHz spectrometer using tetramethylsilane as an internal standard. Mass spectra were obtained with a JEOL JMS SX102 mass spectrometer operating at 70 eV (EI), or a Varian Saturn 2000 instrument (GC-MS, EI), or a Bruker microTOF spectrometer (ESI). Melting points were determined in open capillary tubes with a Büchi Melting Point B-545 apparatus and are uncorrected.

General procedure for the preparation of the phosphonium salts 3 and 4

PPh3 (5.0 mmol) was added to 3,5-dimethoxybenzyl bromide (4.2 mmol) in dry acetone (40 ml) or to an alkyl bromide (4.2 mmol) in dry toluene (5–10 ml). The solution was refluxed overnight. The products **3** and **4a–f** were crystallized by addition of Et2O (**3**, 91%, mp 269 °C; **4a–f**, 71–87%, mp **4a** 97 C, **4b** 101 C, **4c** 101 C, **4d** 102 C, **4e** 106 C, **4f** 104 C). Washing with Et2O gave **4g** and **4h** as amorphous solids (**4g**, 79%; **4h**, 71%). **3**: 1H NMR (300 MHz, CDCl3):  3.55 (s, 6H, OCH3), 5.33 (d, 2H, *J* = 14.4 Hz, CH2P), 6.29–6.31 (m, 1H, ArH) 6.35 (t, 2H, *J* = 2.2 Hz, ArH) 7.61–7.81 (m, 15H, ArH); 13C NMR (300 MHz, CDCl3):  30.7, 31.3, 55.5, 101.4, 109.2, 109.3, 117.3, 118.4, 129.2, 130.0, 130.2, 134.5, 134.6, 135.0, 160.7. 1H NMR and 13C NMR of the products **4a–f** were very similar but consistent with the change in chain length and in agreement with the literature [2]. **4a**: 1H NMR (200 MHz, CDCl3):  0.82–0.86 (m, 3H, CH3), 1.18–1.26 (m, 20H, (CH2)10), 1.57–1.63 (m, 4H, (CH2)2), 3.81–3.89 (m, 2H, CH2P), 7.68–7.86 (m, 15H, ArH); 13C NMR (200 MHz, CDCl3):  14.1, 22.3, 22.7, 23.3, 29.2, 29.3, 29.5, 29.6, 30.3, 30.6, 31.9, 117.4, 119.1, 130.5, 130.7, 133.5, 133.7, 135.1. 1H NMR and 13C NMR of the products **4g–h** were very similar but consistent with the change in chain length. **4g**: m/z (ESI): 461 (M+  Br). **4h**: 1H NMR (300 MHz, CDCl3):  1.17–1.25 (m, 10H, (CH2)5), 1.59–1.65 (m, 6H, (CH2)3), 2.28 (t, 2H, *J* = 7.5 Hz, CH2COOCH3), 3.66 (s, 3H, OCH3), 3.77–3.85 (m, 2H, CH2P), 7.69–7.89 (m, 15H, ArH); 13C NMR (300 MHz, CDCl3):  22.5, 22.8, 23.1, 24.9, 28.1, 29.1, 29.3, 30.3, 30.5, 34.1, 51.5, 118.0, 119.1, 130.4, 10.6, 132.1, 133.3, 133.4, 133.7, 133.8, 135.0, 174.7; m/z (ESI): 419 (M+  Br).

Methyl 15-formylpentadecanoate (5a)

16-Hydroxyhexadecanoic acid (3.7 mmol, 1.0 g) was stirred in a 100 ml flask with 50 ml of methanol and 1 ml of H2SO4 overnight. The solution was concentrated to a volume of 5–10 ml and diluted with water. The crystalline product was filtered to give pure methyl 16-hydroxyhexadecanoate (95%). 1H NMR (300 MHz, CDCl3):  1.22–1.30 (m, 20H, (CH2)10), 1.54–1.60 (m, 6H, (CH2)3), 2.30 (t, 2H, *J* = 7.8 Hz, CH2COOCH3), 3.64 (t, 2H, *J* = 6.6 Hz, CH2OH), 3.67 (s, 3H, OCH3). Methyl 16-hydroxyhexadecanoate (0.5 g, 1.7 mmol) was stirred with 6 ml of DMSO in a 25 ml two-necked flask under argon gas at 0 C. P2O5 was added (0.74g, 5.2 mmol) and the mixture was allowed to come to room temperature. After 1.5 hours the flask was cooled again to 0 C and 0.8 ml of Et3N was added. Stirring was continued for 1 hour at room temperature. 10% HCl was added and the product extracted with CH2Cl2, washed with brine and purified by flash chromatography (silica gel, CH2Cl2) giving **5a** (64%). 1H NMR (300 MHz, CDCl3):  1.21–1.29 (m, 20H, (CH2)10), 1.58–1.64 (m, 4H, (CH2)2), 2.30 (t, 2H, *J* = 7.6 Hz, CH2COOCH3), 2.42 (td, 2H, *J* = 7.3 Hz, *J* = 1.8 Hz, CH2CHO), 3.67 (s, 3H, OCH3), 9.76 (t, 1H, *J* = 1.8 Hz, CHO); 13C NMR (300 MHz, CDCl3):  22.1, 25.0, 29.2, 29.3, 29.36, 29.44, 29.6, 34.1, 43.9, 51.4, 174.3, 202.9; m/z (EI): 81 (7), 95 (10), 135 (7), 191 (12), 209 (10), 235 (12), 253 (25), 284 (M+, 100%).

General procedure for the preparation of 7a–d

The phosphonium salt **3** (0.25 g, 0.5 mmol), the aldehyde **5** (0.5 mmol) and 3 ml of 0.1M K2CO3 (aq) were sealed in a pressure tube. The mixture was stirred under microwave irradiation and external cooling. The temperature reached 100 °C in 2 min where it was kept for 3 min (preparation of **7a**) or 150 C in 2 min where it was kept for 3 min (preparation of **7b–d**). After cooling down, the product was extracted with Et2O. Flash chromatography (silica gel, CH2Cl2) gave the products as mixtures of *cis*/*trans* isomers (**7a**, ca. 80:20 *cis*/*trans* ratio and **7b–d** ca. 60:40 ratio; **7a**, 81%; **7b**, 78%; **7c**, 77%; **7d**, 66%). Alternatively, the phosphonium salt **3** (0.15 g, 0.3 mmol), the aldehyde **5a** (0.071 g, 0.25 mmol) and 0.75 ml of 0.1M K2CO3 (aq) were stirred under microwave irradiation and external cooling in a 5 ml flask. The temperature reached 80 C in 0.5 min where it was kept for 3.5 min. After cooling down, the product was extracted with Et2O. Flash chromatography (silica gel, CH2Cl2) gave **7a** (mixture of *cis*/*trans*, ca. 80:20 ratio, 89%). The mass spectra of the *cis*/*trans* mixtures were very similar with each other but consistent with the change in the chain length. **7a**: m/z (EI) 151 (30%), 152 (100), 177 (30), 191 (40), 417 (50), 418 (95, M+), 419 (15). 7: m/z (EI) 151 (20%), 152 (100), 165 (10), 177 (30), 191 (70), 261 (10), 262 (60, M+), 263 (7). 11a: m/z (EI) 151 (30%), 152 (100), 165 (10), 177 (20), 191 (30), 301 (5), 302 (15, M+), 303 (5).

Methyl 23-(3,5-dimethoxyphenyl)-22-tricosenoate (7e)

1-(3,5-Dimethoxyphenyl)-dodeca-1,11-diene (**7b**) (mixture of *cis*/*trans*, 0.52 g, 1.7 mmol) was dissolved in dry THF under argon and 3.4 ml of a 0.5 M solution of 9-BBN in THF was added at 0 C. The solution was stirred at room temperature for 2 h and then methyl 11-iodoundecanoate (0.85 g, 2.6 mmol), Pd(PPh3)4 (0.058 g, 0.05 mmol) and K3PO4 (1.08 g, 5.1 mmol) were added. The mixture was refluxed for 4 h. Water was added and the product extracted with CH2Cl2. Flash chromatography (silica gel, CH2Cl2) gave **7e** (mixture of *cis*/*trans*, ca. 60:40 ratio, 26%). m/z (EI) 151 (5%), 152 (12), 177 (5), 191 (7), 502 (70, M+), 503 (25).

General procedure for the preparation of 8

The phosphonium salt **4** (0.6 mmol), 3,5-dimethoxybenzaldehyde (**6**) (0.09 g, 0.54 mmol) and K2CO3 (0.14 g, 1.0 mmol) in 1 ml of DMSO and 0.1 ml of H2O were stirred under microwave irradiation and external cooling in a 5 ml flask. The temperature reached 150 °C in 2 minutes where it was kept for 5 min (products **8a–f**) or 130 °C in 2 min where it was kept for 5 min (products **8g–h**). After cooling down, the product was extracted with Et2O. Flash chromatography (silica gel, CH2Cl2) gave **8** as a mixture of *cis*/*trans* isomers (**8a–f** ca. 40:60 *cis*/*trans* ratio, **8g–h** ca. 50:50 ratio, **8a–f**, 68–81%; **8g**, 68%; **8h**, 65%). The mass spectra of the *cis*/*trans* mixtures **8a–h** were similar with each other but consistent with the change in chain length. **8a**: m/z (EI) 151 (15%), 152 (50), 177 (30), 191 (35), 346 (M+, 90), 347 (30).

General procedure for the preparation of 9

The product 7a, 7c–e or 8a–h (1.0 mmol) was dissolved in dichloromethane (40 ml). Palladium on charcoal was added (10 % w/w; 10% w/w of the starting material) and H2 gas introduced to the reaction mixture at atmospheric pressure and room temperature. Filtration of the reaction mixture through Celite gave pure **9a–j** (90–97%). 1H NMR, 13C NMR and MS of the products **9a–e** were very similar but consistent with the change in chain length and in agreement with those published elsewhere [3-4]. **9i**: 1H NMR (300 MHz, CDCl3):  1.20–1.30 (m, 22H, (CH2)11), 1.58–1.66 (m, 4H, (CH2)2), 2.30 (t, 2H, *J* = 7.6 Hz, CH2COOCH3), 2.54 (t, 2H, *J* = 7.8 Hz, CH2Ar), 3.66 (s, 3H, OCH3), 3.78 (s, 6H, OCH3) 6.29 (t, 1H, *J* = 2.2 Hz, Ar), 6.34 (d, 2H, *J* = 2.3 Hz, ArH); 13C NMR (300 MHz, CDCl3):  25.0, 29.2, 29.3, 29.4, 29.5, 29.7, 31.3, 34.1, 36.3, 51.4, 55.2, 97.6, 106.5, 145.4, 160.7, 174.4; m/z (EI): 121 (5), 137 (3), 152 (100), 165 (15), 194 (5), 389 (5), 420 (M+, 45), 421 (20), 422 (10%). **9j**: 1H NMR (200 MHz, CDCl3):  1.19–1.31 (m, 36H, (CH2)18), 1.59–1.67 (m, 4H, (CH2)2), 2.30 (t, 2H, *J* = 7.6 Hz, CH2COOCH3), 2.54 (t, 2H, *J* = 7.8 Hz, CH2Ar), 3.67 (s, 3H, OCH3), 3.78 (s, 6H, OCH3), 6.29 (t, 1H, *J* = 2.2 Hz, ArH), 6.35 (d, 2H, *J* = 2.2 Hz, ArH); 13C NMR (200 MHz, CDCl3):  25.0, 29.2, 29.3, 29.4, 29.47, 29.54, 29.6, 29.7, 31.3, 34.1, 36.3, 51.4, 55.2, 97.5, 106.5, 145.4, 160.7, 174.4; m/z (EI) 121 (3), 137 (5), 152 (100), 165 (15), 194 (5), 473 (10), 504 (M+, 90), 505 (40), 506 (10%). **9g**: 1H NMR (200 MHz, CDCl3):  1.25 (t, 3H, *J* = 7.2 Hz, CH3), 1.28–1.36 (m, 6H, (CH2)3), 1.59–1.64 (m, 4H, (CH2)2), 2.28 (t, 2H, *J* = 7.5 Hz, CH2COOCH2CH3), 2.54 (t, 2H, *J* = 7.7 Hz, CH2Ar), 3.78 (s, 6H, OCH3), 4.12 (quintet, 2H, *J* = 7.2 Hz, CH2CH3), 6.30 (t, 1H, *J* = 2.2 Hz, ArH), 6.40 (d, 2H, *J* = 2.2 Hz, ArH); 13C NMR (200 MHz, CDCl3):  14.3, 25.0, 29.07, 29.13, 31.2, 34.4, 36.3, 55.2, 60.2, 97.6, 106.5, 145.3, 160.7, 174.4; m/z (EI): 121(3), 137 (5), 152 (100), 165 (15), 194 (5), 263 (10), 308 (M+, 70), 309 (35), 310 (10%). **9h**: 1H NMR (300 MHz, CDCl3): 1.22–1.30 (m, 12H, (CH2)6), 1.57–1.63 (m, 4H, (CH2)2), 2.30 (t, 2H, *J* = 7.5 Hz, CH2COOCH3), 2.54 (t, 2H, *J* = 7.6Hz, CH2Ar), 3.66 (s, 3H, OCH3), 3.77 (s, 6H, OCH3), 6.29 (t, 1H, *J* = 2.2 Hz, ArH), 6.34 (d, 2H, *J* = 2.1 Hz, ArH); 13C NMR (300 MHz, CDCl3):  25.0, 29.2, 29.3, 29.4, 29.5, 29.6, 31.3, 34.1, 36.3, 51.4, 55.2, 97.6, 106.5, 145.4, 160.7, 174.4; m/z (EI): 121(3), 137 (3), 152 (100), 165 (15), 194 (5), 319 (10), 350 (M+, 70), 351 (35), 352 (10%).

General procedure for the preparation of 1 and 2

The dimethyl **9** (0.1 mmol) was refluxed in concentrated HBr (7 ml) for 2–4 hours. Water was added to the mixture, which was extracted with EtOAc. Combined organic layers were dried with Na2SO4 and evaporated. Alternatively, dimethyl ether **9a–e** (0.7 mmol) was dissolved in dichloromethane (25 ml) and treated with 2.8 ml of 1M solution of BBr3 in CH2Cl2 at –70C. After 5 hours the solution was allowed to come to room temperature and after addition of water the product was extracted with EtOAc. Purification by flash chromatography (silica gel, CH2Cl2:EtOAc:MeOH, 70:20:1) and recrystallization from cyclohexane gave **1a–e** as white powders (80–84%, mp **1a** 91 C, **1b** 92 C, **1c** 97 C, **1d** 99 C, **1e** 100 C). According to GC analysis, the silylated samples of **1a–e** were ca. 99% pure (silylation: 0.5 ml TMCS:HMDS:pyridine, 1:3:9, was added to 1 mg of **1a–e** and incubated for 1 h at 60 C). Purification by flash chromatography (CH2Cl2:MeOH, 3:1) and wash with CHCl3 gave **2a–d** as white powders (77–82%, mp **2a** 81 C, **2b** 97 C, **2c** 107 C, **2d** 108 C). The purity of **2a–d** was checked by TLC which showed one spot (CH2Cl2:MeOH, 3:1; staining with H2SO4:EtOH:vanillin, 1 ml:100 ml:3.5 mg).

NMR and MS of the products **1a–e** were very similar but consistent with the change in chain length, and consistent with those previously reported [3,5-6]. **1a**: m/z calcd for C21H36O2 (M+): 320.2715; found 320.2704. **1b**: m/z calcd for C23H40O2 (M+): 348.3028; found 348.3019. **1c**: m/z calcd for C25H44O2 (M+): 376.3341; found 376.3334. **1d**: m/z calcd for C27H48O2 (M+): 404.3654; found 404.3645. **1e**: 1H NMR (200 MHz, D6-acetone):  0.85–0.91 (m, 3H, CH3), 1.23–1.35 (m, 40H, (CH2)20), 1.53–1.61 (m, 2H, CH2), 2.45 (t, 2H, *J* = 6.8 Hz, CH2Ar) 6.18 (s, 3H, ArH), 8.01 (br s, 2H, OH); 13C NMR (200 MHz, D6-acetone):  14.4, 23.3, 28.7–31.0 (overlapping with acetone), 32.1, 32.6, 36.6, 100.9, 107.7, 145.9, 159.3; m/z (EI): 123 (45%), 124 (100), 137 (18), 166 (10), 431 (7), 432 (M+, 90), 433 (50); m/z calcd for C29H52O2 (M+): 432.3967; found 432.3978. **2a**: 1H NMR (300 MHz, DMSO-d6):  1.23–1.31 (m, 6H, (CH2)3), 1.46–1.52 (m, 4H, (CH2)2), 2.19 (t, 2H, *J* = 7.3 Hz, CH2COOH), 2.36, (t, 2H, *J* = 7.6 Hz, CH2Ar), 6.01 (s, 3H, ArH), 8.94 (br s, 2H, ArOH), 11.85 (br s, 1H, COOH); 13C NMR (300 MHz, DMSO-d6):  24.5, 28.5, 30.6, 33.6, 35.3, 99.9, 106.2, 144.1, 158.1, 174.4; m/z (ESI): 251.1289 (M+  H; C14H19O4 requires 251.1283). **2b**: 1H NMR (300 MHz, DMSO-d6):  1.20–1.28 (m, 14H, (CH2)7), 1.45–1.51 (m, 4H, (CH2)2), 2.14 (t, 2H, *J* = 6.7 Hz, CH2COOH), 2.35 (t, 2H, *J* = 7.2 Hz, CH2Ar), 6.01 (s, 3H, ArH), 8.97 (br s, 2H, ArOH), 11.89 (br s, 1H, COOH); 13C NMR (300 MHz, DMSO-d6):  24.7, 28.6, 28.7, 28.86, 28.93, 30.6, 34.2, 35.2, 99.9, 106.2, 144.1, 158.1, 175.3; m/z (ESI): 307.1915 (M+  H; C18H27O4 requires 307.1909). **2c**: 1H NMR (300 MHz, DMSO-d6):  1.19–1.27 (m, 24H, (CH2)12), 1.45–1.51 (m, 4H, (CH2)2), 2.17 (t, 2H, *J* = 7.3 Hz, CH2COOH), 2.35 (t, 2H, *J* = 7.6 Hz, CH2Ar) 6.01 (s, 3H, ArH), 8.98 (br s, 2H, ArOH), 11.89 (br s, 1H, COOH); 13C NMR (300 MHz, DMSO-d6):  24.4, 28.5, 28.7, 28.8, 29.0, 30.6, 33.6, 35.2, 99.9, 106.2, 144.1, 158.1, 174.4; m/z (ESI): 401.2662 (M+ + Na; C23H38O4Na requires 401.2668). **2d**: 1H NMR (200 MHz, acetone-d6):  1.24–1.34 (m, 36H, (CH2)18), 1.53–1.61 (m, 4H, (CH2)2), 2.28 (t, 2H, *J* = 7.3 Hz, CH2COOH), 2.45 (t, 2H, *J* = 7.5 Hz, CH2Ar), 6.18 (s, 3H, ArH); 13C NMR (200 MHz, acetone-d6):  25.7, 28.1, 28.7, 29.1, 29.5, 29.8, 30.04, 30.09, 30.2, 30.4, 30.6, 31.0, 32.1, 34.2, 36.6, 100.9, 107.7, 145.9, 159.3, 174.6; m/z (ESI): 463.3782 (M+ + H; C29H51O4 requires 463.3787).

# References

1. Parang, K.; Knaus, E.; Wiebe, L. I.; Sardari, S.; Daneshtalab, M.; Csizmadia, F. *Arch. Pharm. Pharm. Med. Chem.* **1996**, *329*, 475–482. doi:[10.1002/ardp.19963291102](http://dx.doi.org/10.1002/ardp.19963291102)
2. Garigibati, R. S.; Freyer, A. J.; Whittle, R. R.; Weinreb, S. M. *J. Am. Chem. Soc.* **1984,** *106,* 7861–7867. doi:[10.1021/ja00337a036](http://dx.doi.org/10.1021/ja00337a036)
3. Brown, G. D. *J. Nat. Prod.* **1992,** *55,* 1756–1760. doi:[10.1021/np50090a006](http://dx.doi.org/10.1021/np50090a006)
4. Arisawa, M.; Ohimura, K.; Kobayashi, A.; Morita, N. *Chem. Pharm. Bull.* **1989,** *37,* 2431–2434.
5. Kamal-Eldin, A.; Pouru, A.; Eliasson, C.; Åman, P. *J. Sci. Food Agric.* **2000,** *81,* 353–356. doi:[10.1002/1097-0010(200102)81:3<353::AID-JSFA826>3.0.CO;2-X](http://dx.doi.org/10.1002/1097-0010(200102)81:3<353::AID-JSFA826>3.0.CO;2-X)
6. Suzuki, Y.; Esumi, S.; Uramoto, M.; Kono, Y.; Sakurai, A. *Biosci, Biotechnol, Biochem.* **1997,** *61,* 480–486.
